# Supplementary material for: Ferroelastic phase transition and dielectric anomalies in 2,4,6-trimethylanilinium perchlorate
Source: Royal Society of Chemistry journal article supplement (doi:10.1039/c2jm30581j), 2012-01-01
Supplement: c2jm30581j.pdf [file c2jm30581j.pdf]

## Supporting Information

# Ferroelastic Phase Transition and Dielectric Anomalies in 2, 4, 6-Trimethylanilinium Perchlorate

Ren-Gen Xiong

E-mail: xiongrg@seu.edu.cn

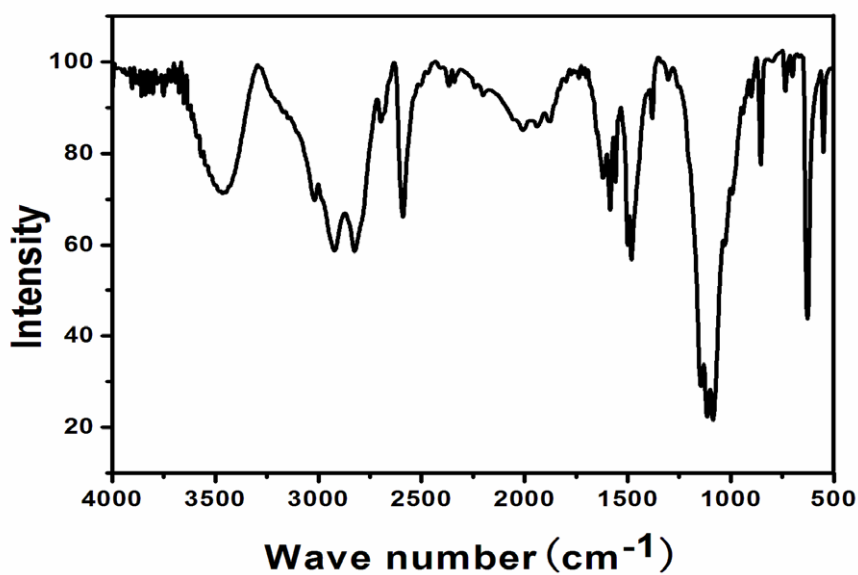

Figure 1S. IR of compound 1

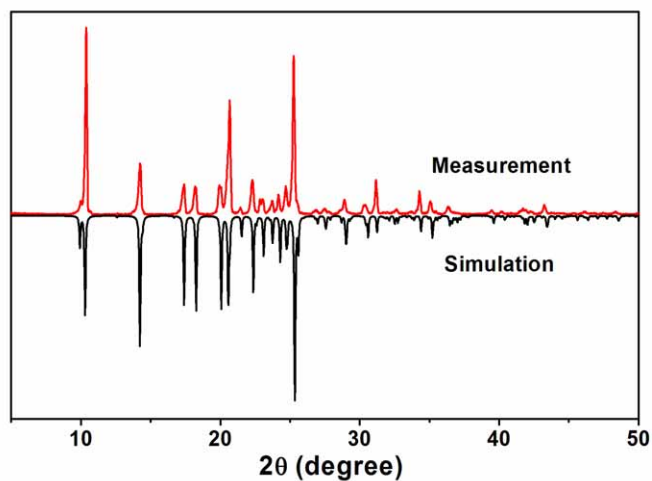

**Figure 2S.** X-ray powder diffraction (XRPD) of compound **1**.

**Table 1s.** Crystal data of compound **1**.

|                                                 |                                                  |                                                  |
|-------------------------------------------------|--------------------------------------------------|--------------------------------------------------|
| Empirical formula                               | C <sub>9</sub> H <sub>14</sub> NClO <sub>4</sub> | C <sub>9</sub> H <sub>11</sub> NClO <sub>4</sub> |
| Formula weight                                  | 235.66                                           | 232.64                                           |
| T/ °C                                           | 25(2)                                            | 110(2)                                           |
| Crystal system                                  | triclinic                                        | monoclinic                                       |
| space group                                     | <i>P</i> -1                                      | <i>P</i> 2 <sub>1</sub> /m                       |
| a / Å                                           | 7.1581(14)                                       | 8.9084(18)                                       |
| b / Å                                           | 8.5937(17)                                       | 7.2253(18)                                       |
| c / Å                                           | 9.0642(18)                                       | 9.172(3)                                         |
| V / Å <sup>3</sup>                              | 546.90(19)                                       | 587.6(3)                                         |
| α / °                                           | 88.74(3)                                         | 90                                               |
| β / °                                           | 79.19(3)                                         | 95.55(3)                                         |
| γ / °                                           | 87.02(3)                                         | 90                                               |
| Z                                               | 2                                                | 2                                                |
| D <sub>cal</sub> / (Mg/m <sup>3</sup> )         | 1.431                                            | 1.315                                            |
| μ / mm <sup>-1</sup>                            | 0.344                                            | 0.319                                            |
| Reflections collected                           | 5745                                             | 5664                                             |
| Reflections unique                              | 2506                                             | 1444                                             |
| Data / restraints / parameters                  | 2506 / 7 / 140                                   | 1444 / 0 / 91                                    |
| Goodness-of-fit on <i>F</i> <sup>2</sup>        | 1.076                                            | 1.394                                            |
| Largest diff. peak and hole / e·Å <sup>-3</sup> | 0.850 and -1.036                                 | 0.556 and -0.457                                 |
| R indices [ <i>I</i> > 2σ( <i>I</i> )]          | <i>R</i> <sub>1</sub> = 0.0790                   | <i>R</i> <sub>1</sub> = 0.1120                   |
|                                                 | <i>wR</i> <sub>2</sub> = 0.2001                  | <i>wR</i> <sub>2</sub> = 0.3461                  |
| R indices (all data)                            | <i>R</i> <sub>1</sub> = 0.0979                   | <i>R</i> <sub>1</sub> = 0.1487                   |
|                                                 | <i>wR</i> <sub>2</sub> = 0.2151                  | <i>wR</i> <sub>2</sub> = 0.3862                  |

**Table 2s.** Hydrogen-bond geometry(Å, °) in compound **1**

| 25 °C                      | D–H    | H···A  | D···A     | D–H···A |
|----------------------------|--------|--------|-----------|---------|
| N1–H1A···O1 <sup>i</sup>   | 0.8900 | 2.2000 | 2.976(5)  | 144.900 |
| N1–H1C···O3 <sup>ii</sup>  | 0.8900 | 2.1600 | 2.969(5)  | 150.500 |
| N1–H1B···O2                | 0.8900 | 2.1500 | 2.974(5)  | 154.400 |
| C9–H9B···Cg                | 0.9600 | 2.9946 | 3.7635    | 138.03  |
| 110 °C                     |        |        |           |         |
| N1–H1A···O2 <sup>iii</sup> | 0.7000 | 2.4400 | 3.046(12) | 145.700 |
| N1–H1B···O1 <sup>iv</sup>  | 0.9500 | 2.3200 | 2.990(12) | 126.700 |
| N1–H1C···O1 <sup>v</sup>   | 0.9500 | 2.3200 | 2.990(12) | 126.700 |

Symmetry codes: (i) 1-x, 1-y, -z; (ii) 1+x, y, z; (iii) 1-x, 0.5-y, 1-z; (iv) x, y, z+1; (v) x, 0.5-y, 1+z

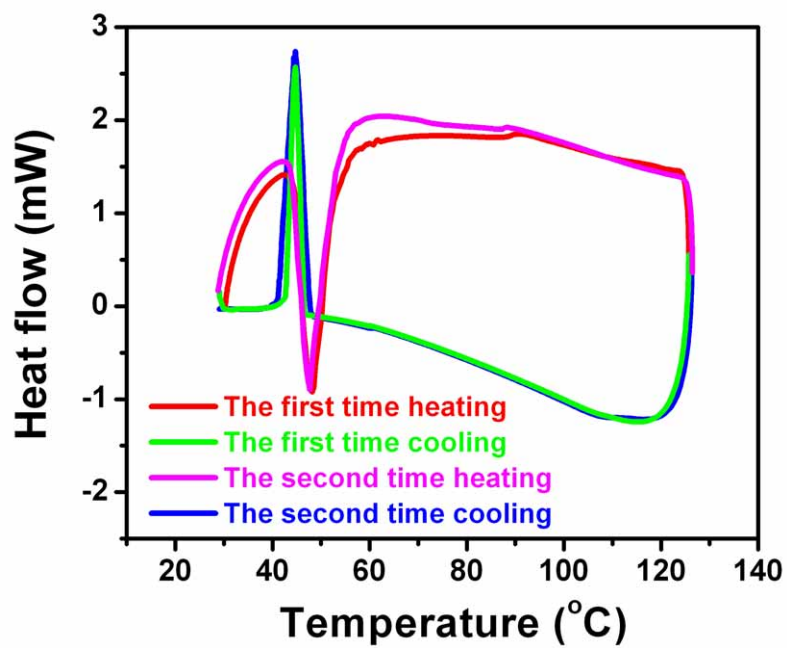

Figure S3 DSC diagram of compound **1** running two cycles.
